# Supplementary material for: Lys694Arg polymorphism leads to blunted responses to LPS by interfering TLR4 with recruitment of MyD88
Source: PubMed Central journal article supplement — Innate Immun. 2020 Jun 8;27(6):483–92. doi: 10.1177/1753425920927479 (PMC8504268; doi:10.1177/1753425920927479), 2020-06-08
Supplement: sj-pdf-1-ini-10.1177_1753425920927479.pdf [file sj-pdf-1-ini-10.1177_1753425920927479.pdf]

## Supplementary material

### The sequence of WT and Lys694Arg(K694R) TLR4 plasmids

#### *WT TLR4*

agatcgctggagacgccatccacgctgtttgacctccatagaagacaccgactctactagaggatcgctagcgctaccg  
gactcagatctcgagGCCACCATGATGTCTGCCTCGCGCCTGGCTGGGACTCTGATCCCA  
GCCATGGCCTTCTCTCCTGCGTGAGACCAGAAAGCTGGGAGCCCTGCGTGGAGG  
TGGTTCTAATATTACTTATCAATGCATGGAGCTGAATTTCTACAAAATCCCCGACAAC  
CTCCCCTTCTCAACCAAGAACCTGGACCTGAGCTTTAATCCCCTGAGGCATTTAGGC  
AGCTATAGCTTCTTCAGTTTTCCAGAACTGCAGGTGCTGGATTTATCCAGGTGTGAAA  
TCCAGACAATTGAAGATGGGGCATATCAGAGCCTAAGCCACCTCTCTACCTTAATATT  
GACAGGAAACCCCATCCAGAGTTTAGCCCTGGGAGCCTTTTCTGGACTATCAAGTTT  
ACAGAAGCTGGTGGCTGTGGAGACAAATCTAGCATCTCTAGAGAACTTCCCATTGG  
ACATCTCAAACTTTGAAAGAACTTAATGTGGCTCACAATCTTATCCAATCTTCAAAAT  
TACCTGAGTATTTTTCTAATCTGACCAATCTAGAGCACTTGGACCTTTCCAGCAACAA  
GATTCAAAGTATTTATTGCACAGACTTGCGGGTTCTACATCAAATGCCCTACTCAATC  
TCTCTTTAGACCTGTCCCTGAACCCTATGAACTTTATCCAACCAGGTGCATTTAAAGA  
AATTAGGCTTCATAAGCTGACTTTAAGAAATAATTTTGATAGTTTAAATGTAATGAAAAC  
TTGTATTCAAGGTCTGGCTGGTTTAGAAGTCCATCGTTTGGTTCTGGGAGAATTTAGA  
AATGAAGGAACTTGGAAAAGTTTGACAAATCTGCTCTAGAGGGCCTGTGCAATTTG  
ACCATTGAAGAATCCGATTAGCATACTTAGACTACTACCTCGATGATATTATTGACTTA  
TTTAATTGTTTGACAAATGTTTCTTCATTTTCCCTGGTGAGTGTGACTATTGAAAGGGT  
AAAAGACTTTTCTTATAATTTCCGATGGCAACATTTAGAATTAGTTAACTGTAAATTTGG  
ACAGTTTCCACATTGAAACTCAAATCTCTCAAAAGGCTTACTTTCACTTCCAACAAA  
GGTGGGAATGCTTTTTTCAGAAGTTGATCTACCAAGCCTTGAGTTTCTAGATCTCAGTA  
GAAATGGCTTGAGTTTCAAAGGTTGCTGTTCTCAAAGTGATTTTGGGACAACCAGCC  
TAAAGTATTTAGATCTGAGCTTCAATGGTGTATTACCATGAGTTCAAACCTTCTTGGGC  
TTAGAACAACCTAGAACATCTGGATTTCCAGCATTCCAATTTGAAACAAATGAGTGAGTT  
TTCAGTATTCCTATCACTCAGAAACCTCATTTACCTTGACATTTCTCATACTCACACCA  
GAGTTGCTTTCAATGGCATCTTCAATGGCTTGTCCAGTCTCGAAGTCTTGAAAATGGC  
TGGCAATTCTTTCCAGGAAAACCTTCCCTTCCAGATATCTTCACAGAGCTGAGAACTTG  
ACCTTCTGGACCTCTCTCAGTGTCAACTGGAGCAGTTGTCTCCAACAGCATTTAAC  
TCACTCTCCAGTCTTCCAGGTAATAATATGAGCCACAACAACCTTCTTTTCACTGGATAC  
GTTTCCTTATAAGTGTCTGAACTCCCTCCAGGTTCTTGATTACAGTCTCAATCACATAA  
TGACTTCCAAAAACAGGAACTACAGCATTTCCTCAAGTAGTCTAGCTTTCTTAAATCTT  
ACTCAGAATGACTTTGCTTGTACTTGTGAACACCAGAGTTTCTGCAATGGATCAAGG  
ACCAGAGGCAGCTCTTGGTGGAAAGTTGAACGAATGGAATGTGCAACACCTTCAGATA  
AGCAGGGCATGCCTGTGCTGAGTTTGAATATCACCTGTCAGATGAATAAGACCATCAT  
TGGTGTGTCGGTCCTCAGTGTGCTTGTAGTATCTGTTGTAGCAGTTCTGGTCTATAAG  
TTCTATTTTACCTGATGCTTCTTGGCTGGCTGCATAAAGTATGGTAGAGGTGAAAACAT  
CTATGATGCCTTTGTTATCTACTCAAGCCAGGATGAGGACTGGGTAAGGAATGAGCTA  
GTAAAGAATTTAGAAGAAGGGTGCCTCCATTTAGCTCTGCCTTCACTACAGAGAC

TTTATTCCCGGTGTGGCCATTGCTGCCAACATCATCCATGAAGGTTTCCATAAAAGCC  
GAAAGGTGATTGTTGTGGTGTCCCAGCACTTCATCCAGAGCCGCTGGTGTATCTTTG  
AATATGAGATTGCTCAGACCTGGCAGTTTCTGAGCAGTCGTGCTGGTATCATCTTCAT  
TGTCTGCAGAAGGTGGAGAAGACCCTGCTCAGGCAGCAGGTGGAGCTGTACCGC  
CTTCTCAGCAGGAACACTTACCTGGAGTGGGAGGACAGTGTCTCTGGGGCGGCACAT  
CTTCTGGAGACGACTCAGAAAAGCCCTGCTGGATGGTAAATCATGGAATCCAGAAGG  
AACAGTGGGTACAGGATGCAATTGGCAGGAAGCAACATCTATCTGAgaattctgcagtcgac  
acgcgtgcgggcccgggatccactagctagaaaggatctgcgatcgctccgggtcccgtca

*Lys694Arg(K694R) TLR4*

catccacgctgttttgacctcatagaagacaccgactctactagaggatcgctagcgctaccggactcagatctcgagGC  
CACCATGATGTCTGCCTCGCGCCTGGCTGGGACTCTGATCCCAGCCATGGCCTTCC  
TCTCCTGCGTGAGACCAGAAAGCTGGGAGCCCTGCGTGGAGGTGGTTCCCTAATATT  
ACTTATCAATGCATGGAGCTGAATTTCTACAAAATCCCCGACAACCTCCCCTTCTCAA  
CCAAGAACCTGGACCTGAGCTTTAATCCCCTGAGGCATTTAGGCAGCTATAGCTTCTT  
CAGTTTCCCAGAACTGCAGGTGCTGGATTTATCCAGGTGTGAAATCCAGACAATTGA  
AGATGGGGCATATCAGAGCCTAAGCCACCTCTCTACCTTAATATTGACAGGAAACCCC  
ATCCAGAGTTTAGCCCTGGGAGCCTTTTCTGGACTATCAAGTTTACAGAAGCTGGTG  
GCTGTGGAGACAAATCTAGCATCTCTAGAGAACTTCCCATTGGACATCTCAAACCTT  
TGAAAGAACTTAATGTGGCTCACAATCTTATCCAATCTTTCAAATTACCTGAGTATTTTT  
CTAATCTGACCAATCTAGAGCACTTGGACCTTTCCAGCAACAAGATTCAAAGTATTTAT  
TGCACAGACTTGCGGGTTCTACATCAAATGCCCTACTCAATCTCTCTTTAGACCTGT  
CCCTGAACCCTATGAACTTTATCCAACCAGGTGCATTTAAAGAAATTAGGCTTCATAAG  
CTGACTTTAAGAAATAATTTTGATAGTTTAAATGTAATGAAAACCTTGATTCAAGGTCTG  
GCTGGTTTAGAAGTCCATCGTTTGGTTCTGGGAGAATTTAGAAATGAAGGAAACTTG  
GAAAAGTTTGACAAATCTGCTCTAGAGGGCCTGTGCAATTTGACCATTGAAGAATTCC  
GATTAGCATACTTAGACTACTACCTCGATGATATTATTGACTTATTTAATTGTTTGACAAA  
TGTTTCTTCATTTTCCCTGGTGAGTGTGACTATTGAAAGGGTAAAAGACTTTTCTTATA  
ATTTCCGGATGGCAACATTTAGAATTAGTTAACTGTAAATTTGGACAGTTTCCCACATTG  
AAACTCAAATCTCTCAAAGGCTTACTTTCACTTCCAACAAAGGTGGGAATGCTTTTT  
CAGAAGTTGATCTACCAAGCCTTGAGTTTCTAGATCTCAGTAGAAATGGCTTGAGTTT  
CAAAGGTTGCTGTTCTCAAAGTGATTTTGGGACAACCAGCCTAAAGTATTTAGATCTG  
AGCTTCAATGGTGTTATTACCATGAGTTCAAACTTCTTGGGCTTAGAACAACCTAGAAC  
ATCTGGATTTCCAGCATTCCAATTTGAAACAAATGAGTGAGTTTTTCAGTATTCCCTATCA  
CTCAGAAACCTCATTACCTTGACATTTCTCATACTCACACCAGAGTTGCTTTCAATG  
GCATCTTCAATGGCTTGCCAGTCTCGAAGTCTTGAAAATGGCTGGCAATTCTTTCCA  
GGAAAACCTTCTTCCAGATATCTTACAGAGCTGAGAAAACCTTGACCTTCTGACCT  
CTCTCAGTGTCAACTGGAGCAGTTGTCTCCAACAGCATTAACTCACTCTCCAGTCTT  
CAGGTACTAAATATGAGCCACAACAACCTCTTTTTCATTGGATACGTTTCTTATAAGTG  
TCTGAACTCCCTCCAGGTTCTTGATTACAGTCTCAATCACATAATGACTTCCAAAAA  
CAGGAACTACAGCATTTTCCAAGTAGTCTAGCTTTCTTAAATCTTACTCAGAATGACTT  
TGCTTGTACTTGTGAACACCAGAGTTTCTGCAATGGATCAAGGACCAGAGGCAGCT  
CTTGGTGAAGTTGAACGAATGGAATGTGCAACACCTTCAGATAAGCAGGGCATGCC

TGTGCTGAGTTTGAATATCACCTGTCAGATGAATAAGACCATCATTGGTGTGTCGGTC  
CTCAGTGTGCTTGTAGTATCTGTTGTAGCAGTTCTGGTCTATAAGTTCTATTTTCACCT  
GATGCTTCTTGCTGGCTGCATAAAGTATGGTAGAGGTGAAAACATCTATGATGCCTTT  
GTTATCTACTCAAGCCAGGATGAGGACTGGGTAAGGAATGAGCTAGTAAGGAATTTAG  
AAGAAGGGGTGCCTCCATTTACAGCTCTGCCTTCACTACAGAGACTTTATTCCCGGTG  
TGGCCATTGCTGCCAACATCATCCATGAAGGTTCCATAAAAGCCGAAAGGTGATTGT  
TGTGGTGTCCCAGCACTTCATCCAGAGCCGCTGGTGTATCTTTGAATATGAGATTGCT  
CAGACCTGGCAGTTTCTGAGCAGTCGTGCTGGTATCATCTTCATTGTCCTGCAGAAG  
GTGGAGAAGACCCTGCTCAGGCAGCAGGTGGAGCTGTACCGCCTTCTCAGCAGGA  
ACACTTACCTGGAGTGGGAGGACAGTGTCTCTGGGGCGGCACATCTTCTGGAGACGA  
CTCAGAAAAGCCCTGCTGGATGGTAAATCATGGAATCCAGAAGGAACAGTGGGTACA  
GGATGCAATTGGCAGGAAGCAACATCTATCTGAgaattctgcagtcgagacctagaaaaacatggag  
caatcacaagtagcaatacagcagctaccaatgctgattgtgcctggctagaagca

## Supplementary Figure

*The fluorescent result of transient transfection of TLR4 WT and TLR4 Lys694Arg(K694R) plasmids conjugated with GFP (green fluorescent protein).*

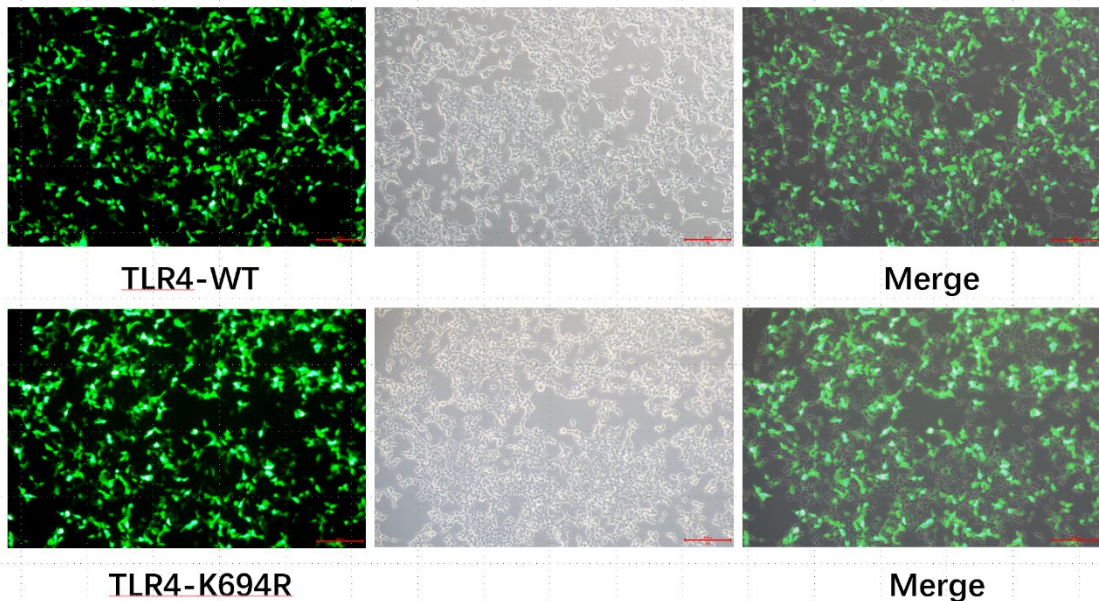

## Supplementary Table

*Distribution of non-synonymous SNPs with natural mutations in the human TLR4 coding region.*

### Polymorphism <sup>i</sup>

Allele TLR4\*B (Gly-299, Ile-399) is associated with a blunted response to inhaled LPS. [1 Publication](#)

### Natural variant

| Feature key                               | Position(s) | Description                                                                                                                                                                                                       | Actions           | Graphical view | Length |
|-------------------------------------------|-------------|-------------------------------------------------------------------------------------------------------------------------------------------------------------------------------------------------------------------|-------------------|----------------|--------|
| Natural variant <sup>i</sup> (VAR_021977) | 175         | T → A. Corresponds to variant dbSNP:rs16906079                                                                                                                                                                    | Ensembl.          |                | 1      |
| Natural variant <sup>i</sup> (VAR_018729) | 188         | Q → R <a href="#">1 Publication</a> Corresponds to variant dbSNP:rs5030713                                                                                                                                        | Ensembl.          |                | 1      |
| Natural variant <sup>i</sup> (VAR_018730) | 246         | C → S <a href="#">1 Publication</a> Corresponds to variant dbSNP:rs5030714                                                                                                                                        | Ensembl.          |                | 1      |
| Natural variant <sup>i</sup> (VAR_074187) | 287         | E → D <a href="#">1 Publication</a>                                                                                                                                                                               |                   |                | 1      |
| Natural variant <sup>i</sup> (VAR_012739) | 299         | D → G in allele TLR4*B; reduced LPS-response; associated with an increased risk for age-related macular degeneration in Caucasian carriers. <a href="#">5 Publications</a> Corresponds to variant dbSNP:rs4986790 | Ensembl, ClinVar. |                | 1      |
| Natural variant <sup>i</sup> (VAR_047563) | 306         | C → W. Corresponds to variant dbSNP:rs2770145                                                                                                                                                                     | Ensembl.          |                | 1      |
| Natural variant <sup>i</sup> (VAR_047564) | 310         | V → G. Corresponds to variant dbSNP:rs2770144                                                                                                                                                                     | Ensembl.          |                | 1      |
| Natural variant <sup>i</sup> (VAR_018731) | 329         | N → S <a href="#">1 Publication</a> Corresponds to variant dbSNP:rs5030715                                                                                                                                        | Ensembl.          |                | 1      |
| Natural variant <sup>i</sup> (VAR_020334) | 342         | F → Y. Corresponds to variant dbSNP:rs5031050                                                                                                                                                                     | Ensembl.          |                | 1      |
| Natural variant <sup>i</sup> (VAR_037668) | 385         | L → F. Corresponds to variant dbSNP:rs11536884                                                                                                                                                                    | Ensembl.          |                | 1      |
| Natural variant <sup>i</sup> (VAR_012740) | 399         | T → I in allele TLR4*B; reduced LPS-response. <a href="#">4 Publications</a> Corresponds to variant dbSNP:rs4986791                                                                                               | Ensembl, ClinVar. |                | 1      |
| Natural variant <sup>i</sup> (VAR_020335) | 400         | S → N. Corresponds to variant dbSNP:rs4987233                                                                                                                                                                     | Ensembl.          |                | 1      |
| Natural variant <sup>i</sup> (VAR_018732) | 443         | F → L <a href="#">1 Publication</a> Corresponds to variant dbSNP:rs5030716                                                                                                                                        | Ensembl.          |                | 1      |
| Natural variant <sup>i</sup> (VAR_018733) | 474         | E → K <a href="#">1 Publication</a> Corresponds to variant dbSNP:rs5030718                                                                                                                                        | Ensembl.          |                | 1      |
| Natural variant <sup>i</sup> (VAR_018734) | 510         | Q → H <a href="#">1 Publication</a> Corresponds to variant dbSNP:rs5030719                                                                                                                                        | Ensembl.          |                | 1      |
| Natural variant <sup>i</sup> (VAR_018735) | 694         | K → R <a href="#">1 Publication</a> Corresponds to variant dbSNP:rs5030722                                                                                                                                        | Ensembl.          |                | 1      |
| Natural variant <sup>i</sup> (VAR_018736) | 763         | R → H <a href="#">1 Publication</a> Corresponds to variant dbSNP:rs5030723                                                                                                                                        | Ensembl.          |                | 1      |
| Natural variant <sup>i</sup> (VAR_018737) | 834         | Q → H <a href="#">1 Publication</a>                                                                                                                                                                               |                   |                | 1      |
